# Supplementary material for: Plausible origins of homochirality in the amino acid catalyzed neogenesis of carbohydrates
Source: Royal Society of Chemistry journal article supplement (doi:10.1039/b500589b), 2005-01-01
Supplement: b500589b.pdf [file b500589b.pdf]

# Conceivable origins of homochirality in the amino acid catalyzed neogenesis of carbohydrates

Armando Córdova\*, Magnus Engqvist, Jesús Casas, Ismail Ibrahim and Henrik Sundén

The Department of Organic Chemistry, Arrhenius Laboratory, Stockholm University, SE-10691 Stockholm, Sweden

## Supporting Information

**General.** Chemicals and solvents were either purchased *puriss p.A.* from commercial suppliers or purified by standard techniques. For thin-layer chromatography (TLC), silica gel plates Merck 60 F254 were used and compounds were visualized by irradiation with UV light and/or by treatment with a solution of phosphomolybdic acid (25 g),  $\text{Ce}(\text{SO}_4)_2 \cdot \text{H}_2\text{O}$  (10 g), conc.  $\text{H}_2\text{SO}_4$  (60 mL), and  $\text{H}_2\text{O}$  (940 mL) followed by heating or by treatment with a solution of *p*-anisaldehyde (23 mL), conc.  $\text{H}_2\text{SO}_4$  (35 mL), acetic acid (10 mL), and ethanol (900 mL) followed by heating. Flash chromatography was performed using silica gel Merck 60 (particle size 0.040-0.063 mm),  $^1\text{H}$  NMR and  $^{13}\text{C}$  NMR spectra were recorded on Varian AS 400. Chemical shifts are given in  $\delta$  relative to tetramethylsilane (TMS), the coupling constants  $J$  are given in Hz. The spectra were recorded in  $\text{CDCl}_3$  as solvent at room temperature, TMS served as internal standard ( $\delta = 0$  ppm) for  $^1\text{H}$  NMR, and  $\text{CDCl}_3$  was used as internal standard ( $\delta = 77.0$  ppm) for  $^{13}\text{C}$  NMR. GC was carried out using a Varian 3800 GC Instrument. Chiral GC-column used: CP-Chirasil-Dex CB 25m x 0.32mm. Optical rotations were recorded on a Perkin Elemer 241 Polarimeter ( $\lambda=589$  nm, 1 dm cell). Optical rotations were recorded on a Perkin Elemer 241 Polarimeter ( $\lambda=589$  nm, 1 dm cell). High resolution mass spectra were recorded on an IonSpec FTMS mass spectrometer with a DHB-matrix.

**Typical experimental procedure for one-step proline-catalyzed asymmetric synthesis of allose 1.** A solution of benzyloxyacetaldehyde (2 mmol) and proline (10 mol %, the e.e of the proline was varied according to Figure 1) in DMF (2 mL) was stirred at room temperature for 2 days. The reaction was quenched by extraction. The combined aqueous layers were back-extracted with 3 portions of EtOAc. The combined organic layers were dried over anhydrous  $\text{MgSO}_4$ , which was subsequently removed by filtration. Next, the solvent was removed under reduced pressure following purification of the crude product mixture by silica-gel column chromatography (EtOAc:pentane-mixtures or toluene:EtOAc mixtures) to afford the desired tetrose and protected allose 1. Remaining starting material was reused in a second reaction sequence to further improve the yield.

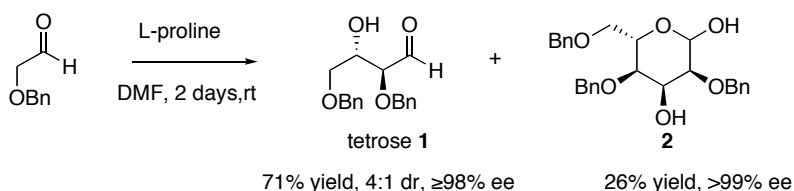

2, 4-Benzyl-*O*-*D*-erythrose:  $^1\text{H-NMR}$  (400 MHz,  $\text{CDCl}_3$ )  $\delta$  (ppm): 3.62 (d,  $J = 5.2$  Hz, 2H), 3.92 (dd,  $J = 5.6, 2.0$  Hz, 1H), 4.13 (m, 1H), 4.51 (d,  $J = 4.8$  Hz, 2H), 4.55 (d,  $J = 11.6$  Hz, 1H), 4.72 (d,  $J = 12.0$  Hz, 1H), 7.30 (m, 10H), 9.71 (d,  $J = 2$  Hz, 1H);  $^{13}\text{C-NMR}$  (100 MHz,  $\text{CDCl}_3$ )  $\delta$  (ppm): 69.6, 70.6, 73.0, 73.2, 83.5, 127.6, 17.8, 127.9, 128.0, 128.1, 128.2, 136.8, 137.4, 201.8;  $[\alpha]_{\text{D}}^{25} = -8.1$  ( $c = 3.4$ ,  $\text{CHCl}_3$ ); MALDI-TOF MS: 323.1261;  $\text{C}_{19}\text{H}_{20}\text{O}_4$  ( $\text{M}+\text{Na}^+$ : calcd 323.1259). The enantiomeric excess of the tetrose was determined by in situ reduction with  $\text{NaBH}_4$  at 0 °C to furnish the corresponding diol. HPLC (Daicel Chiralpak AD, hexanes/*i*-PrOH = 96:4, flow rate 0.5 mL/min,  $\lambda = 254$  nm): major isomer:  $t_{\text{R}(\text{anti})} = 82.33$  min; minor isomer:  $t_{\text{R}(\text{anti})} = 91.55$  min; major isomer:  $t_{\text{R}(\text{syn})} = 97.08$  min; minor isomer:  $t_{\text{R}(\text{syn})} = 98.56$  min.

2, 4, 6-tri-*O*-benzyl-allose **2** ( $\alpha$ : $\beta$ -1:2):  $^1\text{H-NMR}$  (400 MHz,  $\text{CDCl}_3$ )  $\beta$ -anomer:  $\delta$  (ppm) 3.18 (dd, 1H), 3.51 (m, 1H), 3.61-3.81 (m, 2H), 4.01 (m, 1H), 4.28 (t, 1H), 4.18-4.86 (m, 6H), 5.18 (d,  $J = 8.8$  Hz, 1H), 7.28 (m, 15H);  $\alpha$ -anomer:  $\delta$  (ppm) 3.41 (m, 0.5 H), 3.61-3.90 (m, 1H), 4.19 (m, 0.5H), 4.18-4.86 (m, 3H), 5.23 (bs, 0.5H), 7.28 (m, 7.5H);  $^{13}\text{C-NMR}$  (100 MHz,  $\text{CDCl}_3$ )  $\alpha$ - and  $\beta$ - anomer:  $\delta$  (ppm) 65.1, 67.1, 68.6, 68.8, 69.4, 70.8, 71.0, 71.9, 72.0, 73.4, 73.8, 92.5, 100.3, 125.6, 128.2, 128.3, 128.5, 128.6, 128.8, 138.1, 138.2. MALDI-TOF MS: 473.1943;  $\text{C}_{27}\text{H}_{33}\text{O}_6$  ( $\text{M}+\text{Na}^+$ : calcd 473.194). The allose **1** was peracetylated according to the general procedure and the enantiomeric excess determined.

**General determination of the enantiomeric excesses of allose 2:** The hexose (180 mg) was dissolved in 2 mL  $\text{CH}_2\text{Cl}_2$  followed by addition of excess acetic anhydride and a catalytic amount of DMAP (0.1 mol%). The reaction was stirred at room temperature until all the hexose **2** had been acetylated as determined by TLC analyses. The reactions were quenched by extraction. The combined aqueous layers were back-extracted with 3 portions of EtOAc. The combined organic layers were dried over anhydrous  $\text{Na}_2\text{SO}_4$ , which was subsequently removed by filtration. Next, the solvent was removed under reduced pressure following purification of the crude product mixture by silica-gel column chromatography (EtOAc:pentane-mixtures) to quantitatively afford the desired 1, 3-di-acetyl-2, 4, 6-tri-*O*-benzyl-hexoses. Next, the hexoses were dissolved in MeOH and hydrogenated in the presence of a catalytic amount of Pd/C (0.1 mol%). After 17h the catalyst was filtered off and the solvent removed under reduced pressure. The crude benzyl-free hexoses were immediately acetylated *vide infra* to furnish the penta-acetylated sugars. All data of the isolated pure penta-*O*-acetylated  $\beta$ -anomers of hexose **2** was in accordance with 1, 2, 3, 4, 6-Penta-*O*-acetyl- $\beta$ -*L*-allopyranoside.<sup>[1]</sup>

1, 2, 3, 4, 6-Penta-*O*-acetyl- $\beta$ -*L*-allopyranoside:  $^1\text{H-NMR}$  (400 MHz,  $\text{CDCl}_3$ )  $\delta$  (ppm): 2.00 (s, 3H), 2.01(s, 3H), 2.07(s, 3H), 2.11(s, 3H), 2.16 (s, 3H), 4.20 (m, 3H), 4.99 (m, 2H), 5.69 (t,  $J = 2.9$  Hz, 1H), 6.00 (d,  $J = 8.8$  Hz, 1H);  $^{13}\text{C-NMR}$  (100 MHz,  $\text{CDCl}_3$ )  $\delta$  (ppm): 20.4, 20.6, 20.9, 21.1, 61.8, 65.5, 68.1, 68.2, 71.0, 90.0, 169.0, 169.6, 170.1, 170.3, 170.9; GC: (CP-Chirasil-Dex CB);  $T_{\text{inj}} = 250$  °C,  $T_{\text{det}} = 275$  °C, flow = 1.8 mL/min,  $t_{\text{i}} = 100$  °C (10 min),  $t_{\text{f}} = 200$ °C (1.5 °C/ min): major isomer:  $t_{\text{R}} = 62.72$  min;

minor isomer:  $t_R = 61.77$  min;  $[\alpha]_D^{25} = +15.1$  ( $c = 0.5$ ,  $\text{CHCl}_3$ ,  $>99\%$  e.e.); MALDI-TOF MS: 413.1061;  $\text{C}_{16}\text{H}_{22}\text{O}_{11}$  ( $\text{M}+\text{Na}^+$ : calcd 413.1060).<sup>[1]</sup>

**Table 1S.** The relation of the enantiomeric excess of L-proline and that of the newly formed sugar **2**.

| Entry | L-proline | <b>2</b>                 |                       |
|-------|-----------|--------------------------|-----------------------|
|       | Ee (%)    | Yield (%) <sup>[a]</sup> | Ee (%) <sup>[b]</sup> |
| 1     | >99       | 26                       | >99                   |
| 2     | 80        | 23                       | >99                   |
| 3     | 60        | 20                       | >99                   |
| 4     | 50        | 15                       | 99                    |
| 5     | 40        | <15                      | 99                    |
| 6     | 30        | <15                      | 88                    |
| 7     | 20        | n.d. <sup>[c]</sup>      | 55                    |
| 8     | 10        | n.d. <sup>[c]</sup>      | 33                    |
| 9     | 0         | 23                       | 0                     |

[a] Isolated yield after silica-gel column chromatography. [b] The ee of hexose **2** was determined by chiral-phase GC analyses of the peracetylated hexose. Racemic hexose **2** was obtained by D,L-proline catalysis. [c] not determined.

**Direct amino acid catalyzed synthesis of 4.** The cross-aldol adduct **3** was synthesized according to MacMillan's and ours procedures utilizing D,L-proline (10 mol%) as the catalyst.<sup>[2]</sup> The racemic cross-aldol product **3** was dissolved in 1 mL of DMF, with 10 mol% of D-proline. Next, a suspension of propionaldehyde (2 equivalents) in 2 mL DMF was added slowly over the course of 16h to the reaction mixture at 4 °C. Next, the solution was allowed to react at room temperature and stirred for 24h. The reaction was quenched by extraction. The combined aqueous layers were back-extracted with 3 portions of EtOAc. The combined organic layers were dried over anhydrous  $\text{MgSO}_4$ , which was subsequently removed by filtration. Next, the solvent was removed under reduced pressure following purification of the crude product mixture by silica-gel column chromatography (EtOAc:pentane-mixtures) to afford the desired hexose **4** together with the starting aldehyde **3**. The remaining racemic  $\beta$ -hydroxyaldehyde **3** was reused in a second cross-aldol addition to further improve the yield.

<sup>[1]</sup> All the data were in accordance with the peracetylated commercially available  $\beta$ -D-(-)-allopyranose obtained from Sigma. Litt.  $[\alpha]_D = -15.0$  ( $c = 0.5$ ,  $\text{CHCl}_3$ ). E. Lee, P. Browne, P. McArdle, D. Cunningham, *Carbohydr. Res.*, **224**, 285. (1992).; R. U. Lemieux, J. D. Stevens, *Can. J. Chem.*, **43**, 2059 (1965).

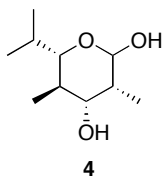

$^1\text{H-NMR}$  (400 MHz,  $\text{CDCl}_3$ )  $\delta$  (ppm): ( $\alpha$ -anomer) 0.89 (m, 6H), 0.93 (m, 6H) 1.71 (m, 1H), 1.87 (m, 2H), 2.05 (m, 1H), 2.69 (bs, 1H), 3.46 (dd,  $J= 10.0, 2.4$  Hz, 1H), 3.77 (dd,  $J= 9.4, 4.6$  Hz, 1H), 5.08 (d,  $J = 1.6$  Hz, 1H), 1H;  $^{13}\text{C-NMR}$  (100 MHz,  $\text{CDCl}_3$ )  $\delta$  (ppm): 10.6, 12.9, 14.4, 20.4, 23.1, 34.9, 38.5, 71.7, 77.0, 97.1; GC peracetylated **3**: (CP-Chirasil-Dex CB);  $T_{\text{inj}} = 250$  °C,  $T_{\text{det}} = 275$  °C, flow = 1.8 mL/min,  $t_i = 100$  °C (35 min),  $t_f = 200$  °C (80 °C/ min): ( $\beta$ -anomer) major isomer:  $t_R = 36.12$  min; minor isomer:  $t_R = 36.16$  min, ( $\alpha$ -anomer) major isomer:  $t_R = 36.42$  min; minor isomer:  $t_R = 36.55$  min;  $[\alpha]_D^{25} = -35.5$  ( $c = 1$ ,  $\text{CHCl}_3$ ); MALDI-TOF MS: 211,1311;  $\text{C}_{10}\text{H}_{20}\text{O}_3$  ( $\text{M}+\text{Na}^+$ : calcd 211.1310).

---

<sup>[2]</sup> (a) A. B. Northrup, D. W. C. MacMillan, *J. Am. Chem. Soc.* **2002**, *124*, 6798. (b) J. Casas, M. Engqvist, B. Kaynak, *Angew. Chem. Int. Ed.* **2005**, Early view.
